# Supplementary material for: CeOx-modified RhNi nanoparticles grown on rGO as highly efficient catalysts for complete hydrogen generation from hydrazine borane and hydrazine
Source: Royal Society of Chemistry journal article supplement (doi:10.1039/c5ta06197k), 2015-01-01
Supplement: c5ta06197k1.pdf [file c5ta06197k1.pdf]

## Electronic Supplementary Material

### **CeO<sub>x</sub>-Modified RhNi Nanoparticles Grown on rGO as Highly Efficient Catalysts for Complete Hydrogen Generation from Hydrazine Borane and Hydrazine**

Zhujun Zhang, Zhang-Hui Lu,\* Hongliang Tan, Xiangshu Chen,\* Qilu Yao

Jiangxi Inorganic Membrane Materials Engineering Research Centre, College of Chemistry and  
Chemical Engineering, Jiangxi Normal University, Nanchang 330022, China.

\*E-mails: luzh@jxnu.edu.cn (Z.-H. Lu).

## Synthesis of hydrazine borane

Typically, 80 mL of anhydrous dioxane containing 21.42 g of hydrazine hemisulfate salt ( $\text{N}_2\text{H}_4 \cdot 1/2\text{H}_2\text{SO}_4$ ) and 10 g of sodium borohydride ( $\text{NaBH}_4$ ) were stirred at 30 °C under an atmosphere of dry argon for 48 h. The resulting slurry was immediately subjected to 12 min of centrifugation at 12000 r.p.m to get the clear solution. Then, the filtrate was evaporated by vacuum dryer at 40 °C over night to get the raw  $\text{N}_2\text{H}_4\text{BH}_3$ , which was further washed with n-pentene. The resulting product is a white solid with a purity of >99% verified by  $^1\text{H}$  and  $^{11}\text{B}$  solution-state NMR by using a Bruker 400M liquid  $^1\text{H}$ NMR using  $\text{CD}_3\text{CN}$  as solvent (Fig. S26).  $^1\text{H}$  NMR ( $\delta/\text{ppm}$ , 400 MHz,  $\text{CD}_3\text{CN}$ , 295.4 K,  $J/\text{Hz}$ ):  $\delta$  5.45 (s, 1H), 3.51 (d,  $J = 69.9$  Hz, 1H), 1.85 – 0.88 (m, 2H).  $^{11}\text{B}$  NMR ( $\delta/\text{ppm}$ , 128 MHz,  $\text{CD}_3\text{CN}$ , 295.3 K,  $J/\text{Hz}$ ):  $\delta$  -17.37 (s), -18.12 (s), -19.23 (d,  $J = 95.5$  Hz), -20.48 – -77.28 (m).

## The redox reaction between $\text{Ce}(\text{OH})_3$ and $\text{Rh}^{3+}$ or $\text{O}_2$ .

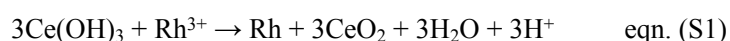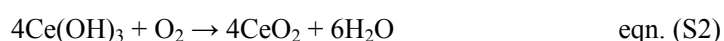

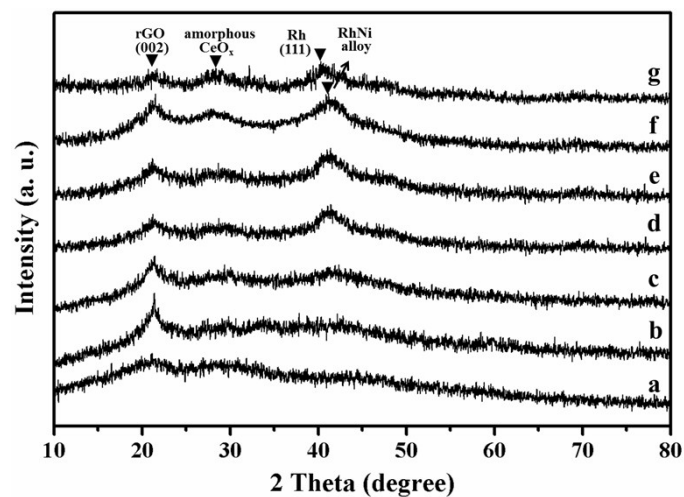

**Fig. S1** Powder XRD patterns of the obtained (a) Ni@CeO<sub>x</sub>/rGO, (b) Rh<sub>0.1</sub>Ni<sub>0.9</sub>@CeO<sub>x</sub>/rGO, (c) Rh<sub>0.3</sub>Ni<sub>0.7</sub>@CeO<sub>x</sub>/rGO, (d) Rh<sub>0.5</sub>Ni<sub>0.5</sub>@CeO<sub>x</sub>/rGO, (e) Rh<sub>0.7</sub>Ni<sub>0.3</sub>@CeO<sub>x</sub>/rGO, (f) Rh<sub>0.8</sub>Ni<sub>0.2</sub>@CeO<sub>x</sub>/rGO and (g) Rh@CeO<sub>x</sub>/rGO catalysts.

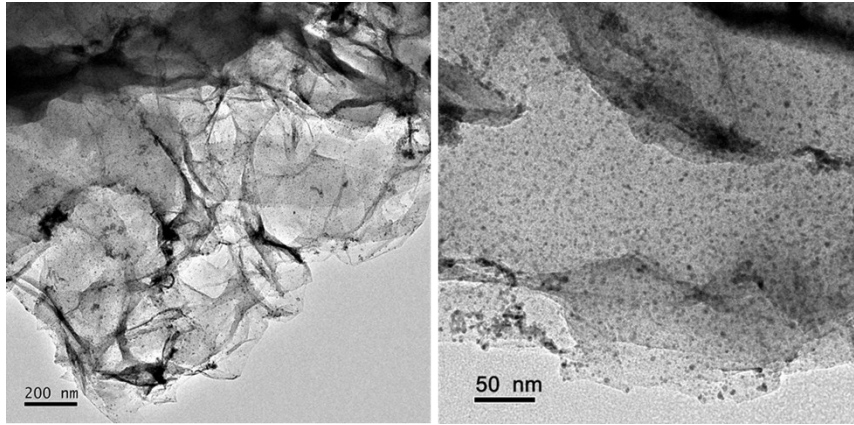

**Fig. S2** TEM images of Rh<sub>0.8</sub>Ni<sub>0.2</sub>@CeO<sub>x</sub>/rGO NCs with different magnifications.

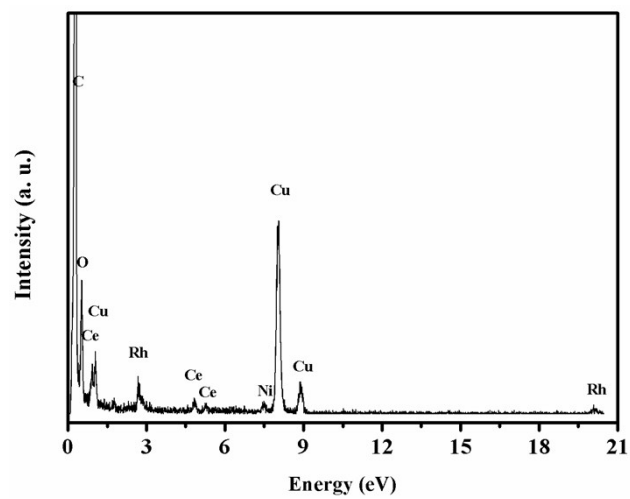

**Fig. S3** EDX pattern of  $\text{Rh}_{0.8}\text{Ni}_{0.2}@ \text{CeO}_x/\text{rGO}$  NCs.

**Table S1.** Catalysts composition determined by inductively coupled plasma atomic emission spectroscopic (ICP-AES).

| Catalysts                                                  | Rh (wt%) | Ni (wt%) | Ce (wt%) | Rh:Ni:Ce (atomic ratio) |
|------------------------------------------------------------|----------|----------|----------|-------------------------|
| Rh@CeO <sub>2</sub> /rGO                                   | 42.1     | ~        | 9.8      | 41:0: 7                 |
| Ni@CeO <sub>x</sub> /rGO                                   |          | 31.6     | 12.0     | 0: 54: 9                |
| Rh <sub>0.8</sub> Ni <sub>0.2</sub> @CeO <sub>x</sub> /rGO | 35.1     | 5.3      | 10.2     | 34: 9:7                 |
| Rh <sub>0.8</sub> Ni <sub>0.2</sub> /rGO                   | 40.2     | 6.5      | ~        | 39:11:0                 |
| Rh <sub>0.8</sub> Ni <sub>0.2</sub> @CeO <sub>x</sub>      | ~        | ~        | ~        | 73:17:14                |

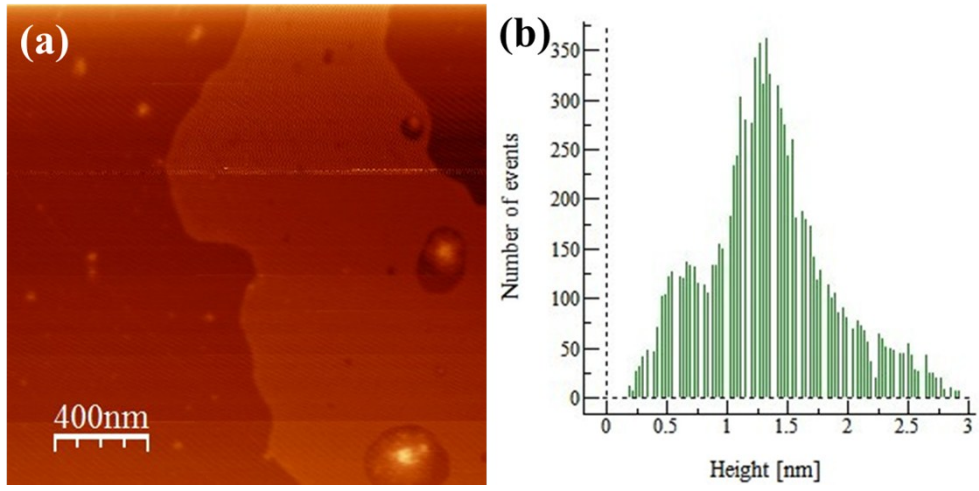

**Fig. S4** (a) AFM image and (b) normal distribution of the height of GO.

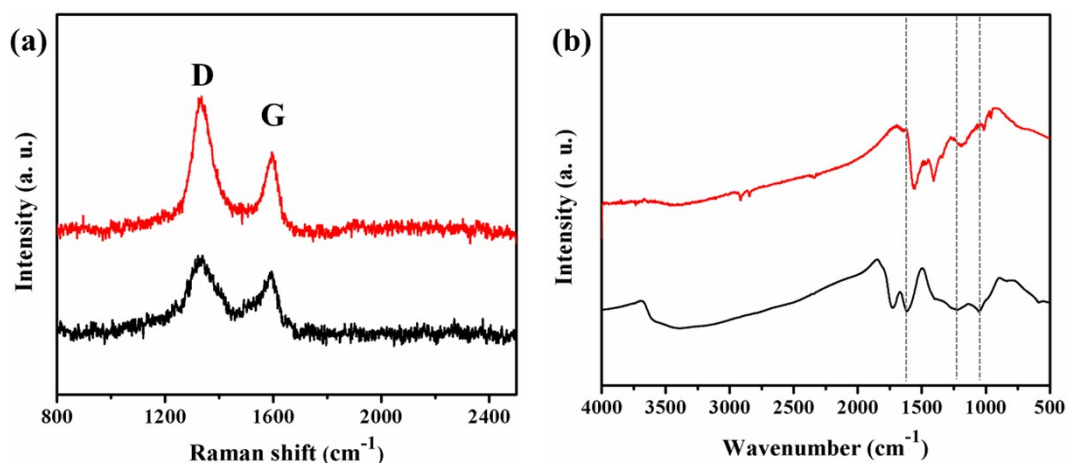

**Fig. S5** (a) Raman and (b) FTIR spectra of GO and Rh<sub>0.8</sub>Ni<sub>0.2</sub>@CeO<sub>x</sub>/rGO NCs.



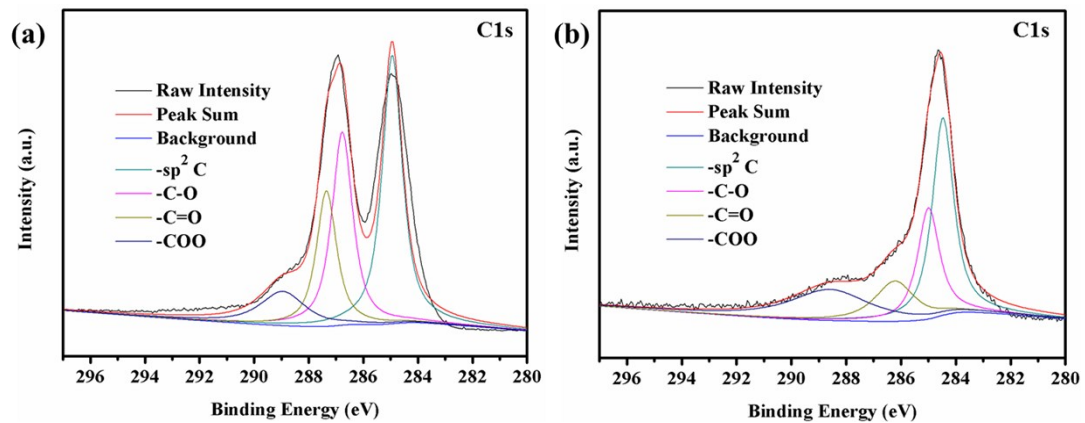

**Fig. S6** XPS spectrum of C 1s for (a) GO and (b) Rh<sub>0.8</sub>Ni<sub>0.2</sub>@CeO<sub>x</sub>/rGO NCs.

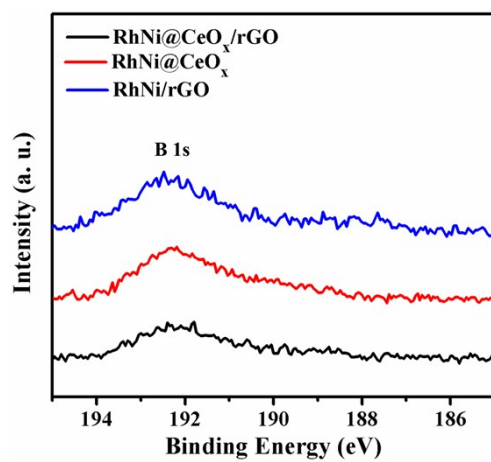

**Fig. S7** XPS spectra of B 1s for the synthesized catalysts.

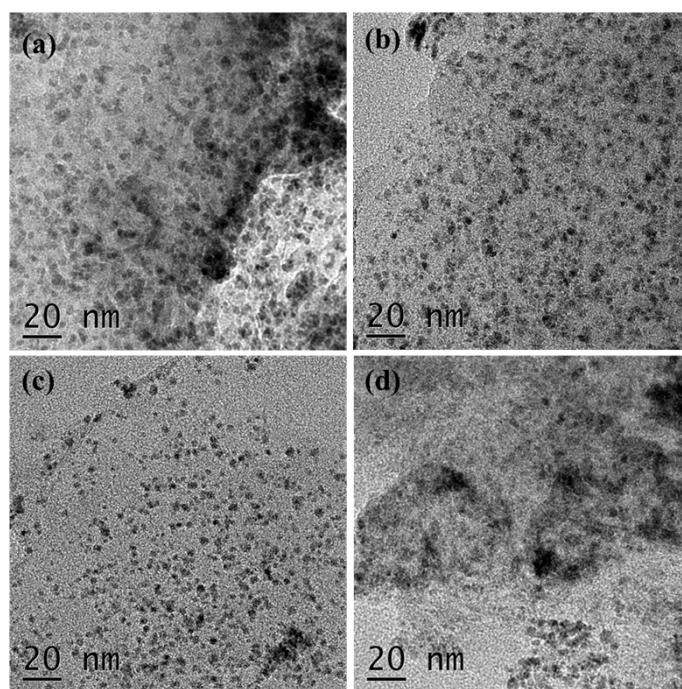

**Fig. S8** TEM images of  $\text{Rh}_{0.8}\text{Ni}_{0.2}@ \text{CeO}_x/\text{rGO}$  NCs prepared with (a) 0; (b) 7.5; (c) 15; and (d) 35 mg of CTAB.

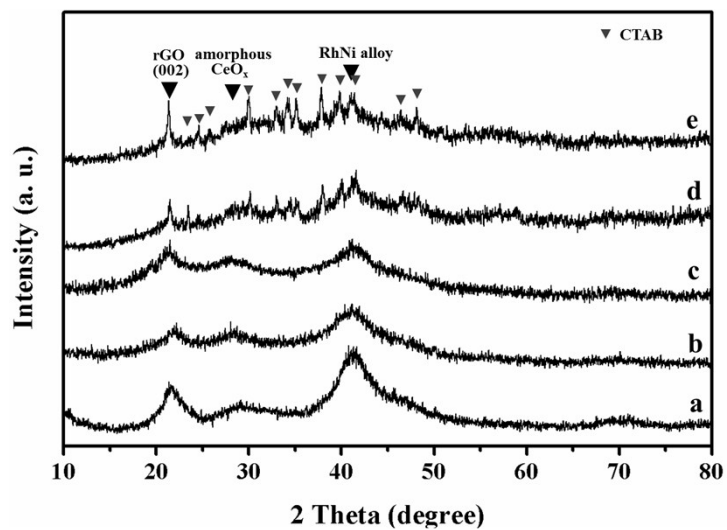

**Fig. S9** XRD patterns of Rh<sub>0.8</sub>Ni<sub>0.2</sub>@CeO<sub>x</sub>/rGO NCs prepared with (a) 0; (b) 7.5; (c) 15; (d) 25 and (e) 35 mg of CTAB.

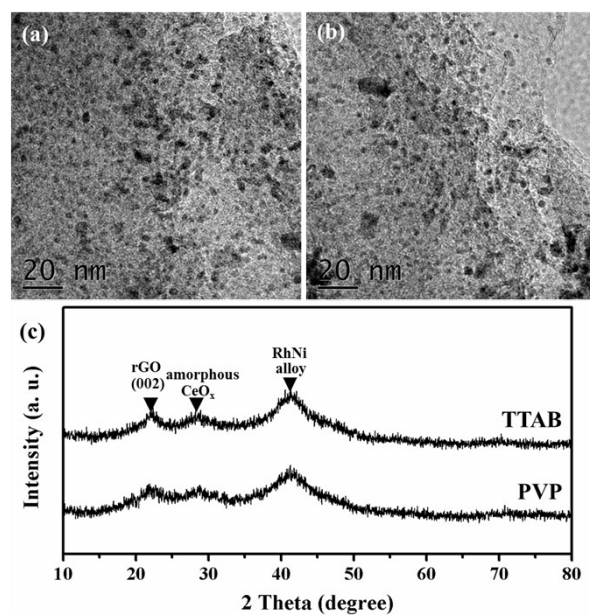

**Fig. S10** TEM images of Rh<sub>0.8</sub>Ni<sub>0.2</sub>@CeO<sub>x</sub>/rGO NCs prepared with (a) PVP and (b) TTAB; (c) XRD patterns of Rh<sub>0.8</sub>Ni<sub>0.2</sub>@CeO<sub>x</sub>/rGO NCs prepared with PVP and TTAB.

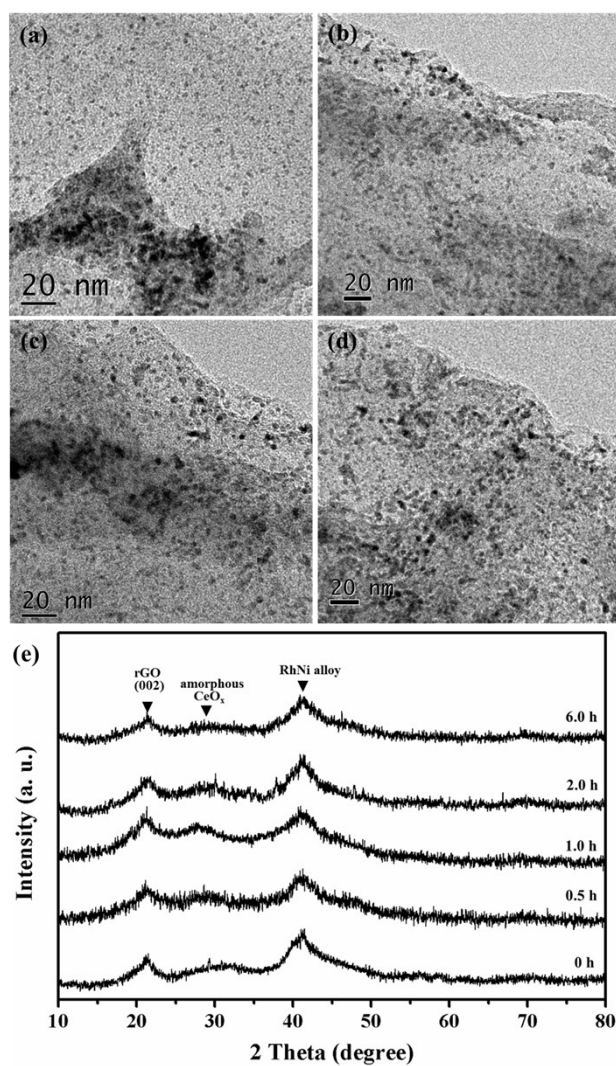

**Fig. S11** TEM images of  $\text{Rh}_{0.8}\text{Ni}_{0.2}@ \text{CeO}_x/\text{rGO}$  NCs prepared by stirring (a) 0 h; (b) 0.5 h; (c) 2.0 h; and (d) 6.0 h during the impregnation period. (e) XRD patterns of  $\text{Rh}_{0.8}\text{Ni}_{0.2}@ \text{CeO}_x/\text{rGO}$  NCs prepared with different stirring time during the impregnation period.

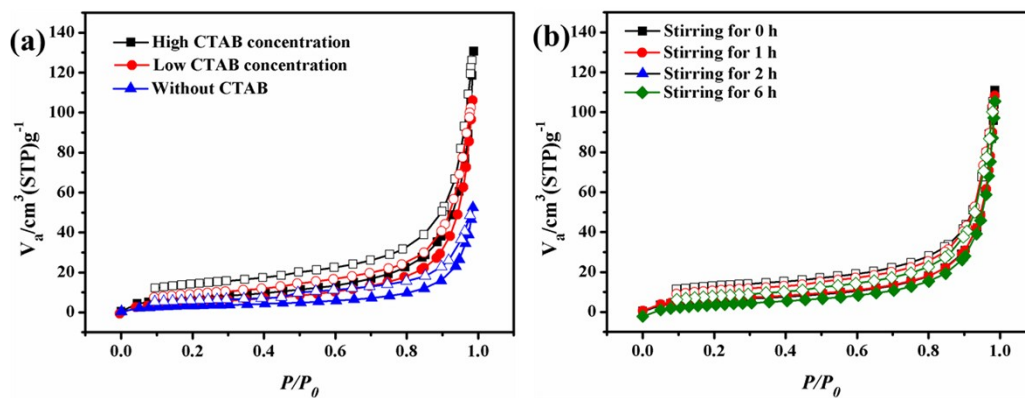

**Fig. S12** Nitrogen adsorption-desorption isotherms of RhNi@CeO<sub>x</sub>/rGO prepared in (a) different CTAB concentrations (High: 35 mg; Low: 15 mg) and (b) by different stirring times during the impregnation period after dehydration under vacuum at 100 °C for 8 h using BELSORP-mini II.

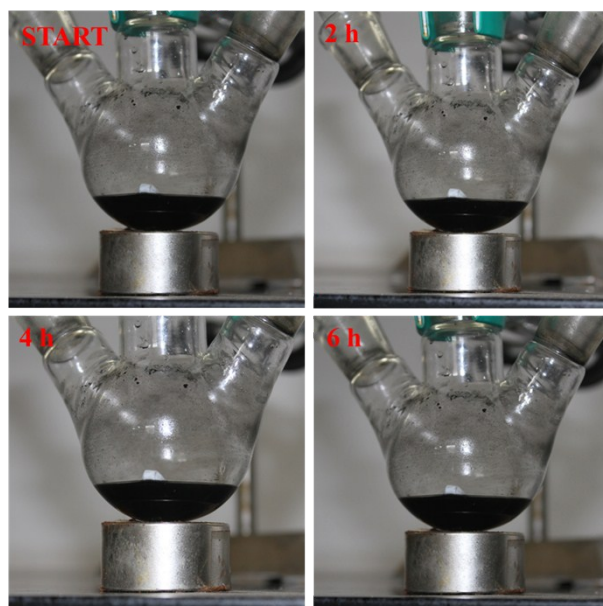

**Fig. S13** Pictures of the as prepared RhNi@CeO<sub>x</sub>/rGO suspensions contact with a ferromagnetic magnet for a period of time.



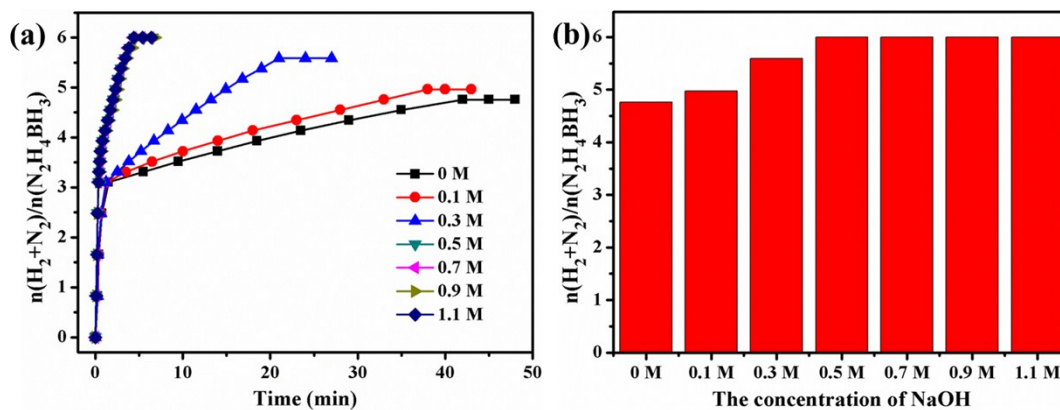

**Fig. S14** (A) Time course plots for H<sub>2</sub> generation from N<sub>2</sub>H<sub>4</sub>BH<sub>3</sub> (200 mM, 5 mL) over Rh<sub>0.8</sub>Ni<sub>0.2</sub>@CeO<sub>x</sub>/rGO (13.9 mol% Ce;  $n_{(\text{Ni}+\text{Rh})}/n(\text{N}_2\text{H}_4\text{BH}_3) = 0.1$ ) with different molar concentration of NaOH at 323 K. (B) The corresponding yield of H<sub>2</sub> and N<sub>2</sub> per mole N<sub>2</sub>H<sub>4</sub>BH<sub>3</sub>.

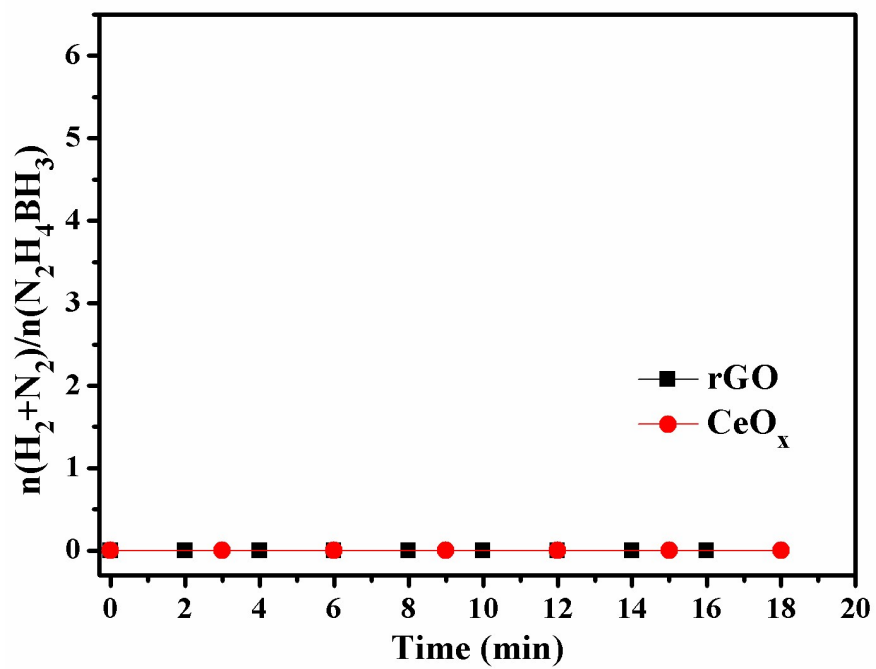

**Fig. S15** Time course plots for hydrogen generation from  $\text{N}_2\text{H}_4\text{BH}_3$  (200 mM, 5 mL) over rGO or  $\text{CeO}_x$  with NaOH (0.5 M) at 323 K.

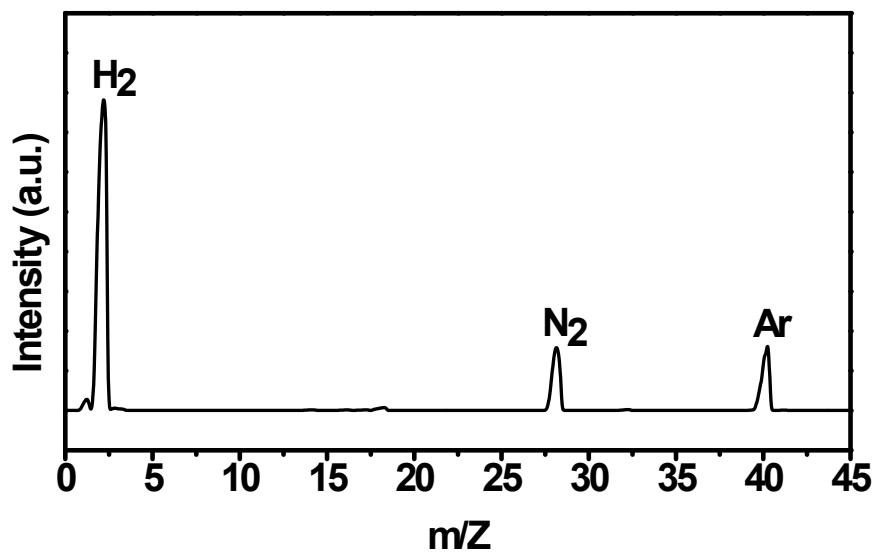

**Fig. S16** Mass spectral profile for gases released from  $\text{N}_2\text{H}_4\text{BH}_3$  using  $\text{Rh}_{0.8}\text{Ni}_{0.2}@/\text{CeO}_x/\text{rGO}$  NCs under an argon atmosphere.

**Table S2.** Comparison of activity of different catalysts for hydrogen generation from  $\text{N}_2\text{H}_4\text{BH}_3$  at 323K.

| Entry | Catalysts                                                      | $n(\text{H}_2 + \text{N}_2)/n(\text{HB})$ | TOF ( $\text{h}^{-1}$ ) | Ref.      |
|-------|----------------------------------------------------------------|-------------------------------------------|-------------------------|-----------|
| 1     | $\text{Ni}_5@\text{Pt}$                                        | 4.4                                       | 2.3 <sup>a</sup>        | 11        |
| 2     | $\text{Ni}_{0.89}\text{Ir}_{0.11}$ NPs                         | 4.9                                       | 9.5 <sup>a</sup>        | 12        |
| 3     | $\text{Ni}_{0.89}\text{Rh}_{0.11}$ NPs                         | 5.1                                       | 9.9 <sup>a</sup>        | 12        |
| 4     | $\text{Ni}_{0.77}\text{Ru}_{0.23}$ NPs                         | 4.0                                       | 23.3 <sup>a</sup>       | 12        |
| 5     | $\text{Ni}_{0.89}\text{Pt}_{0.11}$ NPs                         | 5.79                                      | 18.0 <sup>a</sup>       | 10        |
| 6     | $\text{Ni}@\text{(Rh}_4\text{Ni-alloy)}/\text{Al}_2\text{O}_3$ | 5.74                                      | 72.0 <sup>a</sup>       | 14        |
| 7     | $\text{Rh}_4\text{Ni}$ NPs                                     | 5.8                                       | 90 <sup>b</sup>         | 37        |
| 8     | $\text{Ni}_{0.9}\text{Pt}_{0.1}\text{-CeO}_2$                  | 5.74                                      | 234 <sup>b</sup>        | 47        |
| 9     | $\text{Ni}_{0.9}\text{Pt}_{0.1}/\text{graphene}$               | 6.0                                       | 240 <sup>b</sup>        | 50        |
| 10    | $\text{Rh}_{0.8}\text{Ni}_{0.2}\text{-CeO}_x$                  | 5.83                                      | 228.5                   | This work |
| 11    | $\text{Rh}_{0.8}\text{Ni}_{0.2}/\text{rGO}$                    | 6.0                                       | 206.9                   | This work |
| 12    | $\text{Rh}_{0.8}\text{Ni}_{0.2}@\text{CeO}_x/\text{rGO}$       | 6.0                                       | 666.7                   | This work |

<sup>a</sup>The total TOF values were calculated according to the original data provided by the reports, in which the TOF values were not provided.

<sup>b</sup>The total TOF values were provided by the reports.

### Calculation method for TOF

The total turn-over frequency (TOF) reported in this work is an apparent TOF value based on the number of metal (Rh + Ni) atoms in catalysts, which is calculated from the equation as follows:

$$TOF = \frac{n_{\text{H}_2}}{n_{(\text{Rh}+\text{Ni})} \times t} \quad (1)$$

Where  $n_{\text{H}_2}$  is the mole number of generated  $\text{H}_2$ ,  $n_{(\text{Rh}+\text{Ni})}$  is the total mole number of Ni and Rh in catalyst and  $t$  is the completed reaction time in hour. The TOF values of all the cited catalysts shown in Table S2 are the total TOF values and are normalized to the mass of metals.

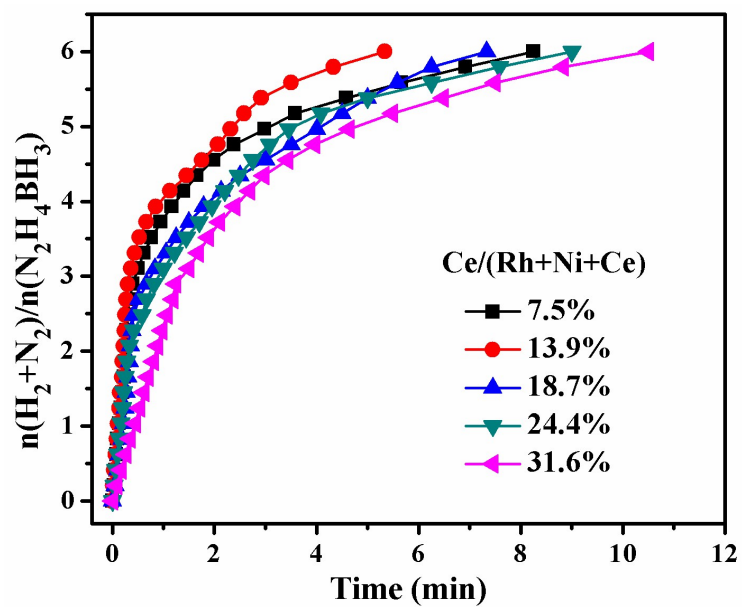

**Fig. S17** Time course plots for H<sub>2</sub> generation from N<sub>2</sub>H<sub>4</sub>BH<sub>3</sub> (200 mM, 5 mL) over Rh<sub>0.8</sub>Ni<sub>0.2</sub>@CeO<sub>x</sub>/rGO NCs with different molar content of Ce ( $n_{(\text{Ni}+\text{Rh})}/n_{(\text{N}_2\text{H}_4\text{BH}_3)} = 0.1$ ) in the presence of NaOH (0.5 M) at 323 K.

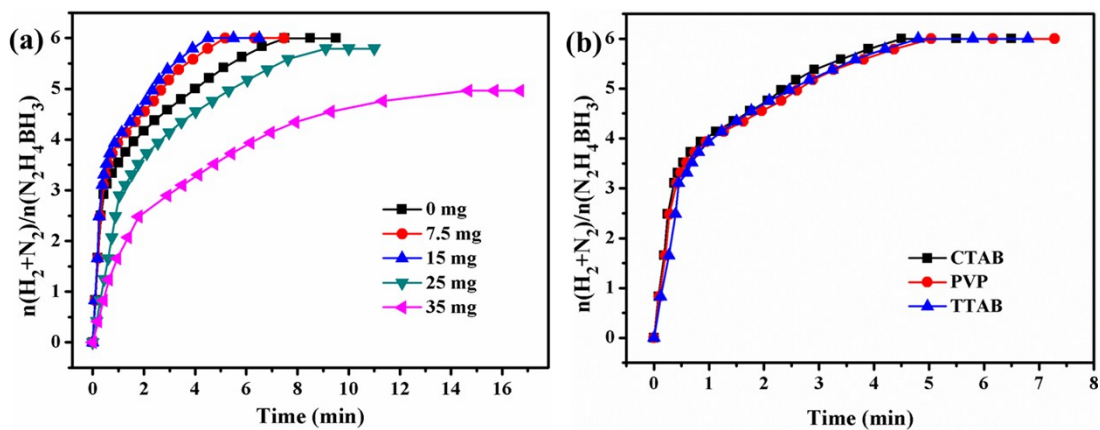

**Fig. S18** Time course plots for H<sub>2</sub> generation from N<sub>2</sub>H<sub>4</sub>BH<sub>3</sub> (200 mM, 5 mL) over Rh<sub>0.8</sub>Ni<sub>0.2</sub>@CeO<sub>x</sub>/rGO NCs prepared with (a) different CTAB concentrations and (b) different surfactants ( $n_{(\text{Ni}+\text{Rh})} / n_{(\text{N}_2\text{H}_4\text{BH}_3)} = 0.1$ ) in the presence of NaOH (0.5 M) at 323 K.

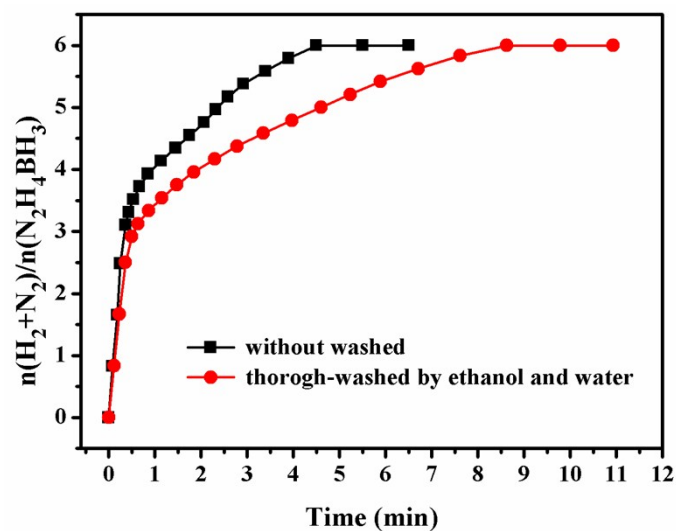

**Fig. S19** Time course plots for H<sub>2</sub> generation from N<sub>2</sub>H<sub>4</sub>BH<sub>3</sub> (200 mM, 5 mL) over Rh<sub>0.8</sub>Ni<sub>0.2</sub>@CeO<sub>x</sub>/rGO NCs with thorough-washed by ethanol and water or without washed ( $n_{(Ni+Rh)}/n_{(N_2H_4BH_3)} = 0.1$ ) in the presence of NaOH (0.5 M) at 323 K.

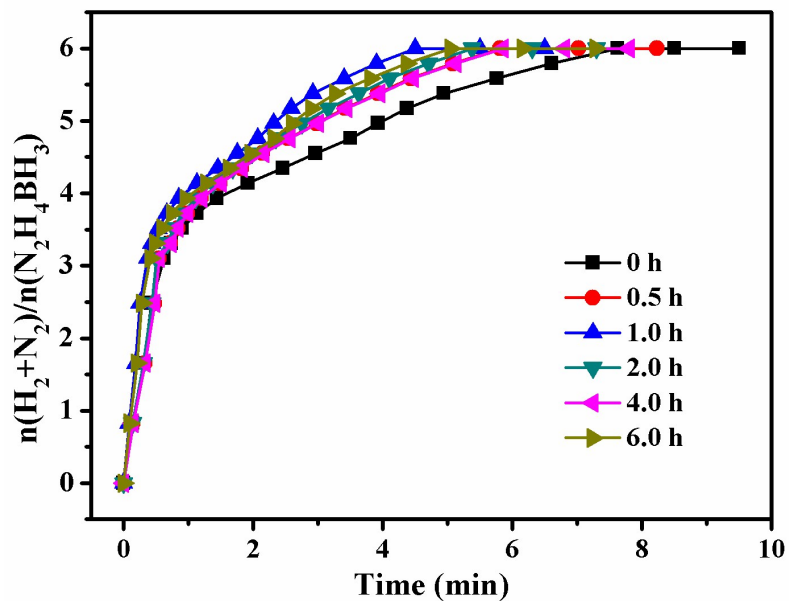

**Fig. S20** Time course plots for H<sub>2</sub> generation from N<sub>2</sub>H<sub>4</sub>BH<sub>3</sub> (200 mM, 5 mL) over Rh<sub>0.8</sub>Ni<sub>0.2</sub>@CeO<sub>x</sub>/rGO NCs prepared by stirring with different times during the impregnation period ( $n_{(\text{Ni}+\text{Rh})} / n_{(\text{N}_2\text{H}_4\text{BH}_3)} = 0.1$ ) in the presence of NaOH (0.5 M) at 323 K.



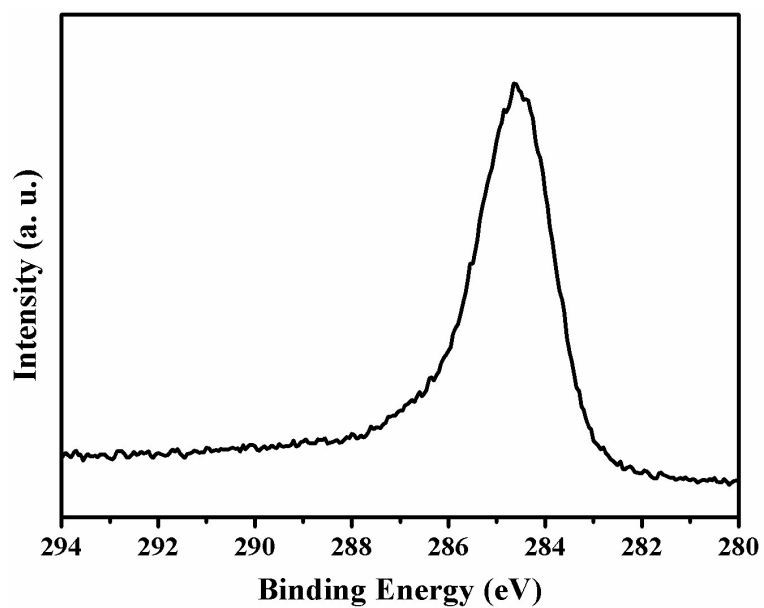

**Fig. S21** XPS spectra for C 1s of Rh<sub>0.8</sub>Ni<sub>0.2</sub>@CeO<sub>x</sub>/rGO NCs synthesized by using an excess amount (40 mg) of NaBH<sub>4</sub>.

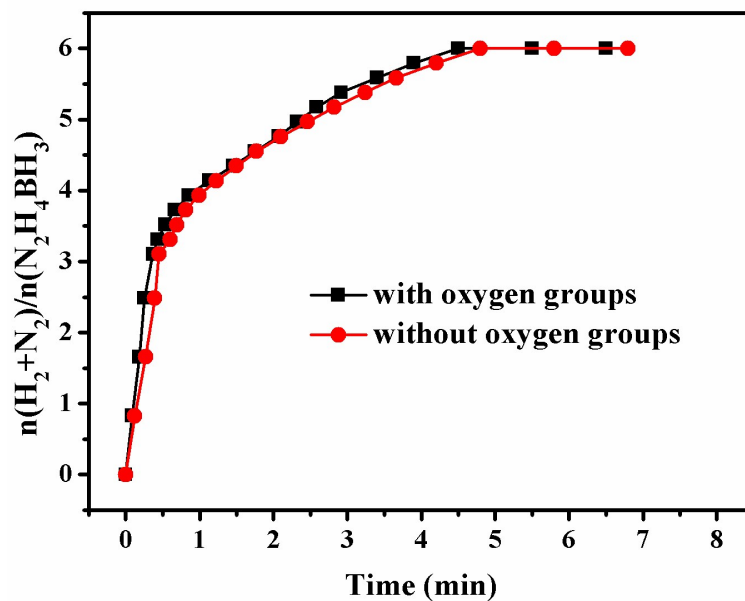

**Fig. S22** Time course plots for H<sub>2</sub> generation from N<sub>2</sub>H<sub>4</sub>BH<sub>3</sub> (200 mM, 5 mL) over Rh<sub>0.8</sub>Ni<sub>0.2</sub>@CeO<sub>x</sub>/rGO NCs with or without residual oxygen groups ( $n_{\text{Ni+Rh}}/n_{\text{N}_2\text{H}_4\text{BH}_3}$  = 0.1) in the presence of NaOH (0.5 M) at 323 K.

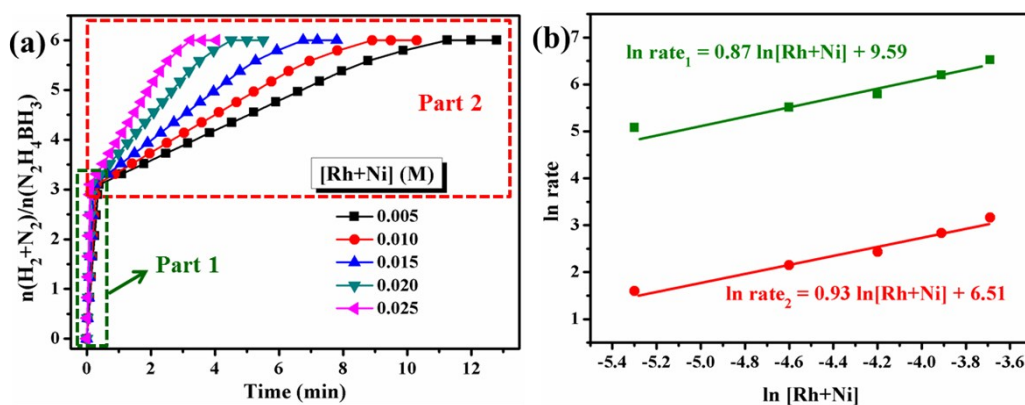

**Fig. S23** Time course plots for  $\text{H}_2$  generation from  $\text{N}_2\text{H}_4\text{BH}_3$  showing (a) hydrolysis of  $\text{BH}_3$  group (Part 1) and decomposition of  $\text{N}_2\text{H}_4$  moiety (Part 2) of  $\text{N}_2\text{H}_4\text{BH}_3$  (13.9 mol% Ce;  $n(\text{Ni} + \text{Rh}) / n(\text{N}_2\text{H}_4\text{BH}_3 \text{ or } \text{N}_2\text{H}_4) = 0.1$ ) at different  $[\text{Rh} + \text{Ni}]$  concentrations. (b) Plot of  $\ln \text{rate}$  versus  $\ln [\text{Rh} + \text{Ni}]$  during  $\text{H}_2$  generation from hydrolysis of  $\text{BH}_3$  group and decomposition of  $\text{N}_2\text{H}_4$  moiety at different  $[\text{Rh} + \text{Ni}]$  concentrations.

**Table S3.** Comparison of the catalytic performance of different catalysts for H<sub>2</sub> generation by N<sub>2</sub>H<sub>4</sub> decomposition.

| Catalyst                                                                                 | T<br>(°C) | $n_{(metal)}/$<br>$n_{(N_2H_4)}$ | H <sub>2</sub><br>selectivity | Reaction<br>times (min) | $E_a$<br>(kJ/mol) | TOF (h <sup>-1</sup> )                 | Ref.             |
|------------------------------------------------------------------------------------------|-----------|----------------------------------|-------------------------------|-------------------------|-------------------|----------------------------------------|------------------|
| Rh <sub>4</sub> Ni                                                                       | 25        | 0.1                              | 100%                          | 160                     | -                 | 7.5 <sup>a</sup>                       | 36               |
| Rh <sub>4</sub> Ni/graphene                                                              | 25        | 0.1                              | 100%                          | 49                      | -                 | 24.5 <sup>a</sup>                      | 52               |
| Ni <sub>0.9</sub> Pt <sub>0.1</sub> /Ce <sub>2</sub> O <sub>3</sub>                      | 25        | 0.1                              | 100%                          | 43                      | 42.3              | 27.9 <sup>a</sup> (28.1 <sup>b</sup> ) | 33               |
| Ni <sub>0.90</sub> Pt <sub>0.05</sub> Rh <sub>0.05</sub> /La <sub>2</sub> O <sub>3</sub> | 25        | 0.1                              | 100%                          | 18                      | -                 | 66.7 <sup>a</sup> (45.9 <sup>b</sup> ) | 29               |
| Ni <sub>3</sub> Pt <sub>7</sub> /graphene                                                | 25        | 0.005                            | 100%                          | -                       | 49.36             | 68 <sup>c</sup>                        | 34               |
| Fe-B/MWCNTs                                                                              | 25        | -                                | 97%                           | -                       | 46.7              | 4032 <sup>c</sup>                      | 59               |
| Co-B honeycomb                                                                           | 25        | -                                | 41.8%                         | -                       | 54.3              | 756 <sup>c</sup>                       | 60               |
| Ni-Al <sub>2</sub> O <sub>3</sub> -HT                                                    | 30        | -                                | 93%                           | 70                      | -                 | -                                      | 21               |
| NiPt <sub>0.057</sub> /Al <sub>2</sub> O <sub>3</sub>                                    | 30        | -                                | 97%                           | 11.5                    | 34.0              | 16.5 <sup>c</sup>                      | 22               |
| Ni-0.080CeO <sub>2</sub>                                                                 | 30        | -                                | 99%                           | -                       | 47.0              | 51.6 <sup>c</sup>                      | 46               |
| RhNi-B                                                                                   | 30        | 0.1                              | 100%                          | 22                      | -                 | 54.5 <sup>a</sup>                      | 17               |
| Pt <sub>60</sub> Ni <sub>40</sub> -CNDs                                                  | 30        | 0.1                              | 100%                          | 7.0                     | 43.9              | 170 <sup>a</sup>                       | 18               |
| <b>Rh<sub>0.8</sub>Ni<sub>0.2</sub>@CeO<sub>x</sub>/rGO</b>                              | <b>30</b> | <b>0.1</b>                       | <b>100%</b>                   | <b>33</b>               | <b>58.0</b>       | <b>36.4</b>                            | <b>this work</b> |
| NiMoB/La(OH) <sub>3</sub>                                                                | 50        | 0.3                              | 100%                          | 15                      | 55.1              | 26.7 <sup>a</sup>                      | 32               |
| Ni <sub>0.6</sub> Fe <sub>0.4</sub> Mo                                                   | 50        | 0.2                              | 100%                          | 15                      | 50.7              | 40 <sup>a</sup> (28.8 <sup>b</sup> )   | 20               |
| Ni <sub>80</sub> Pt <sub>20</sub> @ZIF-8                                                 | 50        | 0.067                            | 100%                          | 26                      | -                 | 68.9 <sup>a</sup> (90 <sup>b</sup> )   | 26               |
| Ni <sub>66</sub> Rh <sub>34</sub> @ZIF-8                                                 | 50        | 0.072                            | 100%                          | -                       | 58.01             | 140 <sup>c</sup>                       | 27               |
| <b>Rh<sub>0.8</sub>Ni<sub>0.2</sub>@CeO<sub>x</sub>/rGO</b>                              | <b>50</b> | <b>0.1</b>                       | <b>100%</b>                   | <b>5.7</b>              | <b>58.0</b>       | <b>210.5</b>                           | <b>this work</b> |
| <b>Rh<sub>0.8</sub>Ni<sub>0.2</sub>@CeO<sub>x</sub>/rGO</b>                              | <b>60</b> | <b>0.1</b>                       | <b>100%</b>                   | <b>3.0</b>              | <b>58.0</b>       | <b>400</b>                             | <b>this work</b> |
| NiFe                                                                                     | 70        | 0.1                              | 100%                          | 190                     | -                 | 6.3 <sup>a</sup>                       | 24               |
| Cu@Fe <sub>5</sub> Ni <sub>5</sub>                                                       | 70        | 0.11                             | 100%                          | 60.0                    | 79.2              | 18.2 <sup>a</sup>                      | 25               |

<sup>a</sup>The total TOF values were calculated according to the original data provided by the reports.

<sup>b</sup>The initial TOF values were provided by the reports.

<sup>c</sup>The TOF values were provided by the reports, in which the calculation method of TOF and total reaction time (or metal molar content) were not given clearly.

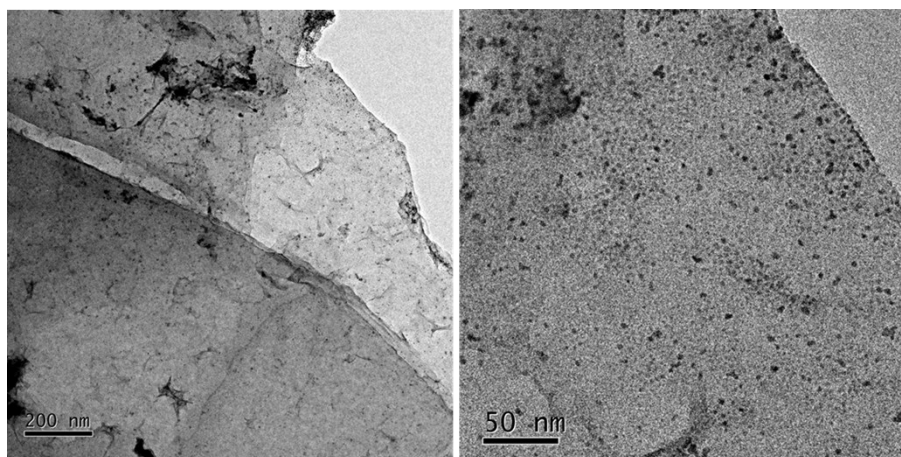

**Fig. S24** TEM images of  $\text{Rh}_{0.8}\text{Ni}_{0.2}@ \text{CeO}_x/\text{rGO}$  NCs after the durability and reusability test with different magnifications.

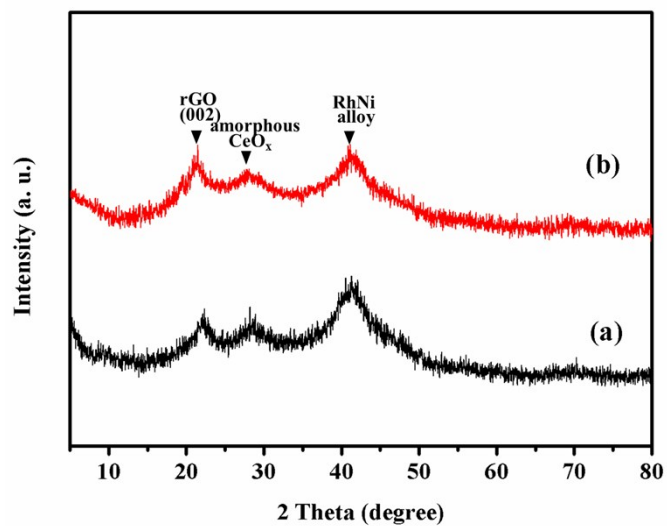

**Fig. S25** Powder XRD patterns of (a) fresh synthesized  $\text{Rh}_{0.8}\text{Ni}_{0.2}@ \text{CeO}_x/\text{rGO}$  NCs and (b) the  $\text{Rh}_{0.8}\text{Ni}_{0.2}@ \text{CeO}_x/\text{rGO}$  NCs after the durability and reusability test.

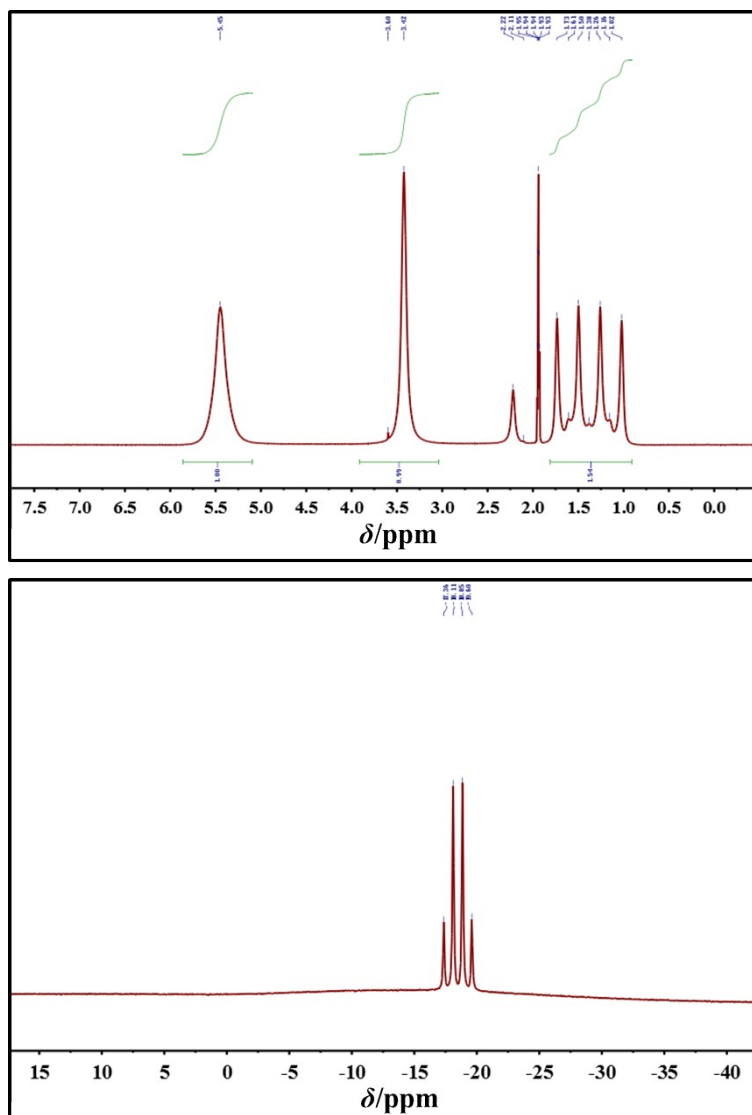

**Fig. S26**  $^1\text{H}$  (top) and  $^{11}\text{B}$  (bottom) solution-state NMR spectra of the as-synthesized hydrazine borane in  $\text{CD}_3\text{CN}$ . These spectra show that hydrazine borane is synthesized with a purity of  $>99\%$ .
